JUST PUBLISHED!

## Competency in Combining Pharmacotherapy and Psychotherapy Integrated and Split Treatment, Second Edition

### Core Competencies in Psychotherapy

Michelle B. Riba, M.D., M.S., Richard Balon, M.D., and Laura Weiss Roberts, M.D., M.A.

Series Editor: Glen O. Gabbard, M.D.

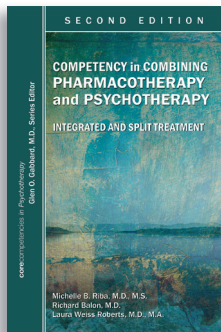

This book is designed to help psychiatrists at any stage of their career achieve competency in combining and coordinating pharmacotherapeutic and psychotherapeutic treatments for the benefit of their patients.

This second edition, addresses both integrated (single clinician) and split/collaborative (multiple clinicians) treatments, discussing for each:

- The selection of medication and psychotherapy
- The patient evaluation and opening
- Sequencing
- Evaluating, monitoring, and supervising treatment
- Terminating and transitioning patient care

The book also offers a chapter—new to this second edition—that focuses on primary care access for mental health services in the context of integrated and split/collaborative care.

2018 • 175 pages • ISBN 978-1-61537-066-5 • Paperback • \$65.00 • Item #37066

2018 • 175 pages • ISBN 978-1-61537-180-8 • eBook • \$52.00 • Item #37180

20% Discount for American Psychiatric Association Members

25% Discount for APA Resident-Fellow Members

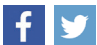

AMERICAN  
PSYCHIATRIC  
ASSOCIATION  
PUBLISHING

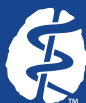

Order @ [www.appi.org](http://www.appi.org)

Email: [appi@psych.org](mailto:appi@psych.org)

Phone: 1-800-368-5777

Priority Code AH1805A

# Our Work Matters

Hope. Recovery. Wellbeing.

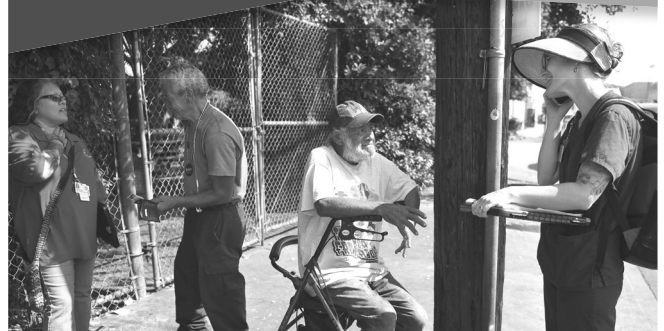

## Join us and make a difference for those who need it the most.

Los Angeles County Department of Mental Health is a nationally recognized leader providing a wide range of services to one of the largest populations in the country. We invite you to join our team as we help the most vulnerable in our community find a path to independence and personal recovery.

Starting annual salary immediately post residency completion is **\$233,784** with **potential bonuses of \$32,000 annually**. Student **loan repayment** and recruitment incentives available.

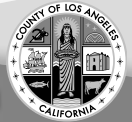

[www.psychiatristjobs.la](http://www.psychiatristjobs.la)

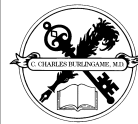

## Call for Nominations

The Institute of Living/Hartford Hospital is pleased to announce that nominations are now being accepted for the 2019 C. Charles Burlingame Award. This award, honoring an outstanding leader in psychiatric education, research or administration, is made in the memory of Dr. Burlingame, psychiatrist-in-chief from 1931 to 1950.

We invite you to nominate a person who has significantly advanced the field of psychiatry. The nomination must include a current curriculum vitae and two letters of support describing the candidate's achievements.

The Institute of Living is a comprehensive behavioral health system for the evaluation and treatment of psychiatric and addiction disorders. We offer a full continuum of services to patients and remain committed to the highest standards of clinical care, research and education.

### Past Recipients

- |                                       |                                   |
|---------------------------------------|-----------------------------------|
| 1988 Robert Kellner, M.D., Ph.D.      | 2004 David H. Barlow, Ph.D.       |
| 1989 William T. Carpenter, Jr., M.D.  | 2005 Herbert D. Kleber, M.D.      |
| 1990 Dennis P. Cantwell, M.D.         | 2006 Daniel N. Stern, M.D.        |
| 1991 George E. Vaillant, M.D.         | 2007 Jerrold F. Rosenbaum, M.D.   |
| 1992 A. John Rush, M.D.               | 2008 K. Ranga Rama Krishnan, M.D. |
| 1993 John C. Nemiah, M.D.             | 2009 David J. Kupfer, M.D.        |
| 1994 Maurice J. Martin, M.D.          | 2010 Professor Sir Michael Rutter |
| 1995 Otto F. Kernberg, M.D.           | 2011 Jeffrey A. Lieberman, M.D.   |
| 1996 Charles P. O'Brien, M.D., Ph.D.  | 2012 Judith L. Rapoport, M.D.     |
| 1997 Glen Owen Gabbard, M.D.          | 2013 Nora D. Volkow, M.D.         |
| 1998 Lissy F. Jarvik, M.D., Ph.D.     | 2014 Daniel R. Weinberger, M.D.   |
| 1999 Nancy C. Andreasen, M.D., Ph.D.  | 2015 David A. Brent, M.D.         |
| 2000 Lewis L. Judd, M.D.              | 2016 Steven S. Sharfstein, M.D.   |
| 2001 Paul S. Appelbaum, M.D.          | 2017 Harold Alan Pincus, M.D.     |
| 2002 Charles B. Nemeroff, M.D., Ph.D. | 2018 Kenneth S. Kendler, M.D.     |
| 2003 Dilip V. Jeste, M.D.             |                                   |

Institute  
of Living

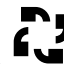

A Division of Hartford Hospital

Nominations should be sent no later than December 5, 2018 to:  
Harold I. Schwartz, M.D.  
HHC Regional VP, Behavioral Health  
Psychiatrist-in-Chief  
The Institute of Living/Hartford Hospital  
200 Retreat Ave., Hartford, CT 06106  
or e-mailed to  
[Kathleen.Day@hhchealth.org](mailto:Kathleen.Day@hhchealth.org)

# PSYCHIATRYonline

Your Destination for Lifelong Learning in Psychiatry

The one-stop resource for information on diagnosis, treatment, guidelines, the latest research, and breaking news from the field.

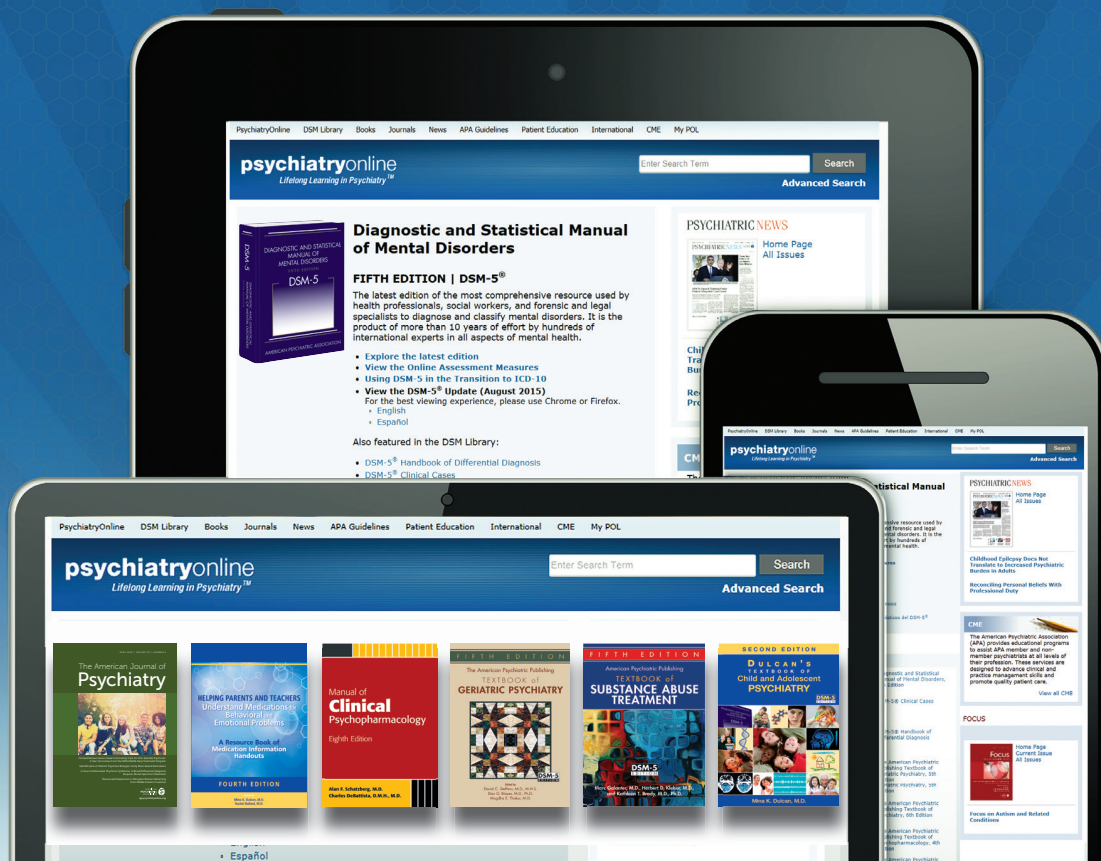

Subscribe to products individually or to the DSM Select package that includes the DSM-5® library, books and select journals.

**Go to [www.appi.org](http://www.appi.org) to subscribe.**

*Institutional subscription options are available. For more information contact: [institutions@psych.org](mailto:institutions@psych.org); 800-368-5777 ext. 3720*

AMERICAN  
PSYCHIATRIC  
ASSOCIATION  
PUBLISHING  
[www.appi.org](http://www.appi.org)

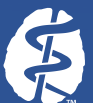

Source: http://ps.psychiatryonline.org/doi/suppl/10.1176/ps.2018.69.issue-9/suppl_file/back.pdf
