# Psychiatric Services

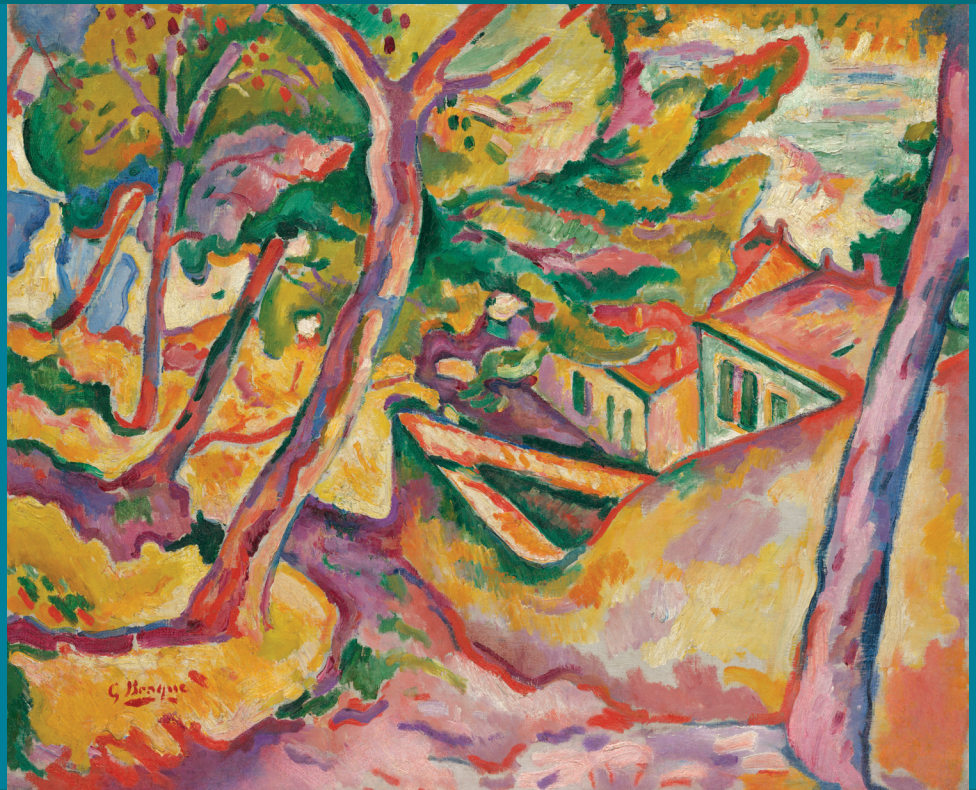

An RCT on mHealth versus clinic-based group intervention

Peer work: a systematic review and reporting guidelines for peer studies

Better treatment engagement with collaborative care for youths

Personal Account: On dignity and psychiatry
